# Supplementary material for: Cell-surface display technology and metabolic engineering ofSaccharomyces cerevisiaefor enhancing xylitol production from woody biomass
Source: Royal Society of Chemistry journal article supplement (doi:10.1039/c8gc03864c), 2019-01-01
Supplement: c8gc03864c1.pdf [file c8gc03864c1.pdf]

## Electronic Supplementary Information (ESI)

**Table S1** Yields of xylitol production in function of different parameters tested for the optimization of Kraft pulp fermentation by cell surface-engineered strain YPH499-XR-XYL-XYN of *S. cerevisiae*. The influence of parameters such as the amount of commercial hemicellulases cocktail ([CHC]; 0 to 0.1 g/g-DW) used during pre-treatment, the amount of substrate (LBKP; 25 to 125 g-DW/L) or the amount of yeast cells (25 to 100 g-WW/L) added for the fermentation, on the yields of xylitol production has been evaluated. Values represent averages  $\pm$  standard deviation of the results from three independent experiments.

| Parameters                        |                                      |                                                | Yields |  |
|-----------------------------------|--------------------------------------|------------------------------------------------|--------|--|
| Amount of CHC<br>(g/g-DW)         | Y <sub>xylitol/xylose</sub><br>(g/g) | Y <sub>xylitol/CHC</sub><br>(g/mg)             |        |  |
| 0                                 | 0.02 $\pm$ 0.01                      | ND                                             |        |  |
| 0.01                              | 0.05 $\pm$ 0.01                      | 0.04 $\pm$ 0.01                                |        |  |
| 0.02                              | 0.27 $\pm$ 0.03                      | 0.11 $\pm$ 0.02                                |        |  |
| 0.05                              | 0.42 $\pm$ 0.04                      | 0.07 $\pm$ 0.01                                |        |  |
| 0.1                               | 0.64 $\pm$ 0.05                      | 0.05 $\pm$ 0.01                                |        |  |
| Amount of LBKP<br>(g-DW/L)        | Y <sub>xylitol/xylose</sub><br>(g/g) | Y <sub>xylitol/LBKP</sub><br>(g/g-DW/L)        |        |  |
| 25                                | 0.26 $\pm$ 0.04                      | 0.04 $\pm$ 0.01                                |        |  |
| 50                                | 0.27 $\pm$ 0.03                      | 0.04 $\pm$ 0.01                                |        |  |
| 75                                | 0.13 $\pm$ 0.03                      | 0.02 $\pm$ 0.01                                |        |  |
| 100                               | 0.02 $\pm$ 0.01                      | 0.004 $\pm$ 0.001                              |        |  |
| 125                               | 0.01 $\pm$ 0.002                     | 0.001 $\pm$ 0.0005                             |        |  |
| Amount of yeast cells<br>(g-WW/L) | Y <sub>xylitol/xylose</sub><br>(g/g) | Y <sub>xylitol/yeast cells</sub><br>(g/g-WW/L) |        |  |
| 25                                | 0.09 $\pm$ 0.01                      | 0.03 $\pm$ 0.01                                |        |  |
| 50                                | 0.19 $\pm$ 0.02                      | 0.03 $\pm$ 0.01                                |        |  |

|     |             |              |
|-----|-------------|--------------|
| 75  | 0.24 ± 0.03 | 0.02 ± 0.005 |
| 100 | 0.27 ± 0.03 | 0.02 ± 0.01  |

**Table S2 Yields of xylitol production from Kraft pulp by different cell surface-engineered strains YPH499-XR (control), YPH499-XR-XYL-XYN and YPH499-XR-XYL<sub>sss</sub>-XYN<sub>sss</sub> of *S. cerevisiae*.** Values represent averages ± standard deviation of the results from three independent experiments.

| Strains                                                         | Yields                   |                        |
|-----------------------------------------------------------------|--------------------------|------------------------|
|                                                                 | Yxylitol/xylose<br>(g/g) | Yxylitol/CHC<br>(g/mg) |
| YPH499-XR                                                       | 0.05 ± 0.01              | 0.02 ± 0.01            |
| YPH499-XR-BGL                                                   | 0.10 ± 0.01              | 0.04 ± 0.01            |
| YPH499-XR-BGL-XYL-XYN                                           | 0.28 ± 0.03              | 0.11 ± 0.02            |
| YPH499-XR-BGL-XYL <sub>sss</sub> -XYN                           | 0.30 ± 0.02              | 0.13 ± 0.01            |
| YPH499-XR-BGL-XYL <sub>sss</sub> -XYN <sub>sss</sub>            | 0.44 ± 0.02              | 0.18 ± 0.01            |
| YPH499-XR-BGL-XYL <sub>sss</sub> -XYN <sub>sss</sub> (scale up) | 0.5 ± 0.01               | 0.2 ± 0.06             |

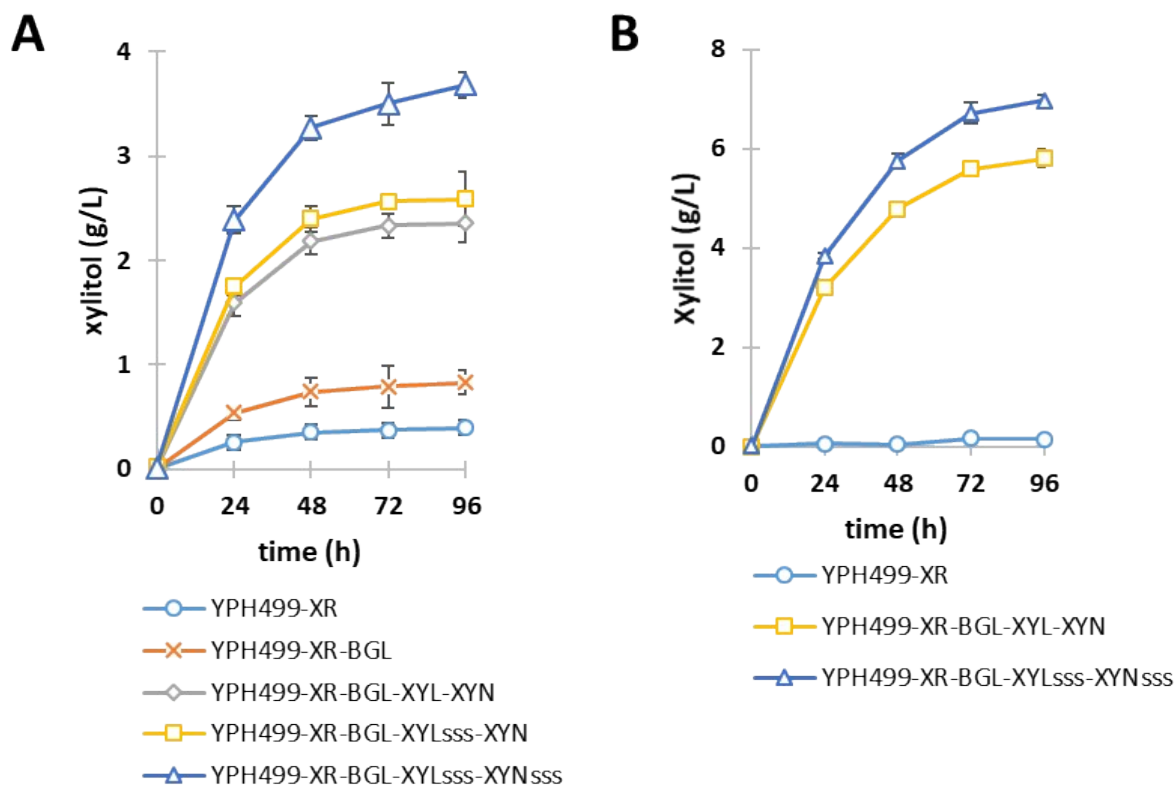

**Figure S1 Time course monitoring of xylitol production by different strains and from different substrate.** **A:** Fermentation of pretreated LBKP by different cell surface engineered strains of *S. cerevisiae* such as YPH499-XR (negative control), YPH499-XR-BGL, YPH499-XR-BGL-XYL-XYN, YPH499-XR-BGL-XYLsss-XYN and YPH499-XR-BGL-XYLsss-XYNsss. **B:** Fermentation of 50 % rice straw hydrolysate by YPH499-XR (negative control), YPH499-XR-BGL-XYL-XYN, and YPH499-XR-BGL-XYLsss-XYNsss, in absence of CHC in the same conditions than previously described [34].

**Table S3 GenBank and/or UniProt accession numbers of the genes/proteins/promoters/signal sequences/anchors that were used for metabolic engineering in this study**

| Components                                                     | Accession No.                            |
|----------------------------------------------------------------|------------------------------------------|
| <i>Trichoderma reesei</i> $\beta$ -xylanase (XYN2)             | U24191.1                                 |
| <i>Aspergillus oryzae</i> $\beta$ -xylosidase A (XylA)         | AB013851.1                               |
| <i>Aspergillus aculeatus</i> $\beta$ -glucosidase (BGL1)       | D64088.1                                 |
| <i>Saccharomyces cerevisiae</i> TDH3 promoter                  | NC_001139.9 (883834..884477, complement) |
| <i>Saccharomyces cerevisiae</i> SED1 promoter                  | NC_001136.10 (599993..600792)            |
| <i>Rhizopus oryzae</i> glucoamylase secretion signal sequence  | D00049.1 (115..188)                      |
| <i>Saccharomyces cerevisiae</i> SED1 secretion signal sequence | NC_001136.10 (600793..600849)            |
| <i>Saccharomyces cerevisiae</i> SAG1 anchor                    | NC_001142.9 (442909..443871, complement) |
| <i>Saccharomyces cerevisiae</i> SED1 anchor                    | NC_001136.10 (600796..601809)            |
| <i>Saccharomyces cerevisiae</i> SAG1 terminator                | NC_001142.9 (442464..442899, complement) |
